# Supplementary material for: Unveiling pandemic patterns: a detailed analysis of transmission and severity parameters across four COVID-19 waves in Bogotá, Colombia
Source: PubMed Central journal article supplement — BMC Glob Public Health. 2024 Dec 10;2:83. doi: 10.1186/s44263-024-00105-x (PMC11629508; doi:10.1186/s44263-024-00105-x), 2024-12-10
Supplement: 44263_2024_105_MOESM1_ESM.pdf [file 44263_2024_105_MOESM1_ESM.pdf]

# Additional file 1

## Tables S1 – S6, Figures S1 – S4

### Unveiling Pandemic Patterns: A Detailed Analysis of Transmission and Severity Parameters Across Four COVID-19 Waves in Bogotá, Colombia

David Santiago Quevedo (1,2), Nicolás T. Domínguez (1), Diego Fernando Perez (3), Maria Alejandra Cabrera Polanía (3), Juan David Serrano Medina (3), Felipe Segundo Abril-Bermúdez (3), Diane Moyano Romero (3), Diana Sofia Rios Oliveros (3), Manuel Alfredo González Mayorga (3), Charles Whittaker (4), Zulma M. Cucunubá (1) ∞

1. Departamento de Epidemiología Clínica y Bioestadística. Pontificia Universidad Javeriana, Bogotá, Colombia
2. Institute for Theoretical Physics, Utrecht University, Utrecht, Netherlands
3. Dirección de Epidemiología, Análisis y Gestión de políticas de salud colectiva, Secretaría Distrital de Salud de Bogotá, Colombia
4. MRC Centre for Global Disease Analysis, Imperial College London, London, UK

∞ Correspondance to: [zulma.cucunuba@javeriana.edu.co](mailto:zulma.cucunuba@javeriana.edu.co)

**Table S1.** Overview of confirmed cases, hospitalisations, ICUs, deaths, and maximum instantaneous reproduction number  $R(t)$  in each wave.

| Wave | Start           | End              | Confirmed | Hospital | ICU    | Deaths | $R(t)$ (95% BCI)   |
|------|-----------------|------------------|-----------|----------|--------|--------|--------------------|
| 1    | 26 Feb<br>2020  | 25 Sep,<br>2020  | 270,929   | 30,161   | 10,808 | 7,296  | 2.44 (2.12 - 2.86) |
| 2    | 01 Nov,<br>2020 | 01 Mar,<br>2021  | 331,060   | 24,564   | 8,476  | 6,068  | 1.22 (1.21 - 1.23) |
| 3    | 01 Mar,<br>2021 | 14 Sept,<br>2021 | 781,860   | 42,516   | 15,667 | 13,195 | 1.46 (1.44 - 1.47) |
| 4    | 20 Nov,<br>2021 | 24 Mar,<br>2022  | 305,481   | 8,590    | 1,362  | 1,715  | 2.27 (2.25 - 2.28) |

**Table S2.** Relative transmission advantage between Alpha, Delta, Gamma, Mu, and Omicron (95% BCI). The pivot variant corresponds to the denominator in the logarithm of the definition:  $T_{w,v} = \frac{T_{w,0}}{T_{v,0}}$ . Thus, the variants in the columns are  $n$  times more transmissible than the pivot variant of each row.

| Pivot variant  | Alpha                 | Delta                 | Gamma                 | Mu                    | Omicron               |
|----------------|-----------------------|-----------------------|-----------------------|-----------------------|-----------------------|
| <b>Alpha</b>   | 1                     | 1.84<br>(1.63 - 2.13) | 1.35<br>(1.19 - 1.56) | 1.45<br>(1.28 - 1.68) | 3.92<br>(3.35 - 4.61) |
| <b>Delta</b>   | 0.55<br>(0.47 - 0.61) | 1                     | 0.73<br>(0.72 - 0.75) | 0.79<br>(0.78 - 0.8)  | 2.13<br>(1.95 - 2.33) |
| <b>Gamma</b>   | 0.75<br>(0.64 - 0.84) | 1.37<br>(1.33 - 1.4)  | 1                     | 1.08<br>(1.06 - 1.09) | 2.91<br>(2.65 - 3.2)  |
| <b>Mu</b>      | 0.69<br>(0.6 - 0.78)  | 1.27<br>(1.24 - 1.29) | 0.93<br>(0.91 - 0.94) | 1                     | 2.7<br>(2.46 - 2.96)  |
| <b>Omicron</b> | 0.26<br>(0.22 - 0.3)  | 0.47<br>(0.43 - 0.51) | 0.34<br>(0.31 - 0.38) | 0.37<br>(0.34 - 0.41) | 1                     |

**Table S3.** Probability density functions for the estimation of epidemiological distributions. The parameter S of the Gen. Log-normal distribution is defined as the following infinite sum:

$$S = \sum_{j=1}^{\infty} (r\sigma)^j [1 + (-1)^j] 2^{j/g} \Gamma((j+1)/s) / \Gamma(j+1), \text{ where } r = 1 \text{ for the mean, and } r = 2$$

for the variance[1]. The abbreviations LN and GLN stand for Log-normal and Generalized Log-normal, respectively.

| PDF( $y q_i$ )                                                                                                                                              | Mean                                                | Variance                                                             |
|-------------------------------------------------------------------------------------------------------------------------------------------------------------|-----------------------------------------------------|----------------------------------------------------------------------|
| Exponential( $y \beta$ ) = $\exp(-\beta y)$                                                                                                                 | $\beta$                                             | $\beta^2$                                                            |
| Gamma( $y \alpha, \beta$ ) = $\frac{\beta^\alpha}{\Gamma(\alpha)} y^{\alpha-1} \exp(-\beta y)$                                                              | $\alpha/\beta$                                      | $\alpha/\beta^2$                                                     |
| Weibull( $y \alpha, \sigma$ ) = $\frac{\alpha}{\sigma} \left(\frac{y}{\sigma}\right)^{\alpha-1} \exp\left(-\left(\frac{y}{\sigma}\right)^\alpha\right)$     | $\sigma\Gamma(1 + 1/\alpha)$                        | $\sigma^2(\Gamma(1 + 2/\alpha) - \Gamma(1 + 1/\alpha)^2)$            |
| LN( $y \mu, \sigma$ ) = $\frac{1}{\sqrt{2\pi}\sigma} \frac{1}{y} \exp\left(-\frac{1}{2}\left(\frac{\log y - \mu}{\sigma}\right)^2\right)$                   | $\exp\left(\mu + \frac{\sigma^2}{2}\right)$         | $[\exp(\sigma^2) - 1] \exp(2\mu + \sigma^2)$                         |
| GLN( $y \mu, \sigma, g$ ) = $\frac{1}{y} \frac{g}{2^{(g+1)/g} \sigma \Gamma(1/g)} \exp\left(-\frac{1}{2} \left \frac{\log y - \mu}{\sigma}\right ^g\right)$ | $\exp(\mu) \left[1 + \frac{S}{2\Gamma(1/g)}\right]$ | $\exp(2\mu) \left[1 + \frac{S}{2\Gamma(1/g)}\right] - \text{mean}^2$ |

**Table S4. Bayes factors  $2 \log(B_{ij})$  for the models fitted to the epidemiological distributions.**

| Delay time     | Gamma    | LN     | Weibull  | Exponential | GLN    |
|----------------|----------|--------|----------|-------------|--------|
| ICU stay       | 603.17   | 55.64  | 1766.67  | 4610.71     | 0      |
| Hosp. stay     | 13804.41 | 120.81 | 17491.57 | 20120.17    | 0      |
| Onset to ICU   | 2143.06  | 384.24 | 3365.65  | 11152.66    | 0      |
| Onset to hosp. | 3320.67  | 549.26 | 9623.35  | 36426.87    | 0      |
| Onset to death | 0        | 658.86 | 1390.76  | 6954.73     | 366.58 |

Rows contain the comparison of the models specified in each column with respect to the best model. Notice that, in every case with found strong evidence in favor of the Gen. Log-normal. In most of the cases we found evidence in favor of the Generalized Log-Normal distribution as the best model, except for the onset-to-death distributions, for which the best model is the Gamma. Notice that, we used the representation  $2 \log(B_{ij})$  for reporting the Bayes factor, following the usual notation[2],[3]. Thus, the null cells of the table correspond to the best model, and the non-null cells contain the Bayes factors between the best model and the rest of them.

**Table S5.** Mean and variance of the epidemiological distributions estimated from the best model (95% BCI).

| Wave | Delay time     | Mean (days)           | Var (days <sup>2</sup> ) |
|------|----------------|-----------------------|--------------------------|
| 1    | Onset to hosp  | 7.41 (7.35 - 7.48)    | 83.48 (82.57 - 84.63)    |
| 2    | Onset to hosp  | 7.95 (7.87 - 8.04)    | 94.88 (93.56 - 96.35)    |
| 3    | Onset to hosp  | 7.77 (7.72 - 7.82)    | 83.12 (82.44 - 83.89)    |
| 4    | Onset to hosp  | 5.54 (5.49 - 5.57)    | 75.56 (67.94 - 78.13)    |
| 1    | Onset to ICU   | 12.31 (12.22 - 12.38) | 491.76 (436.25 - 583.12) |
| 2    | Onset to ICU   | 10.83 (10.68 - 11.01) | 260.29 (257.33 - 267.71) |
| 3    | Onset to ICU   | 9.17 (9.07 - 9.27)    | 120.46 (118.84 - 122.45) |
| 4    | Onset to ICU   | 7.84 (7.55 - 8.17)    | 102.49 (102.18 - 107.22) |
| 1    | Onset to death | 17.42 (17.33 - 17.5)  | 148.85 (143.75 - 154.93) |
| 2    | Onset to death | 18.75 (18.66 - 18.84) | 169.87 (163.41 - 176.47) |
| 3    | Onset to death | 17.47 (17.42 - 17.51) | 143.98 (139.88 - 148.02) |
| 4    | Onset to death | 14.87 (14.65 - 15.03) | 109.71 (102.19 - 118.85) |
| 1    | Hosp. stay     | 10.84 (10.72 - 10.98) | 275.48 (275.43 - 277.16) |
| 2    | Hosp. stay     | 8.83 (8.74 - 8.93)    | 151.97 (151.59 - 152.91) |
| 3    | Hosp. stay     | 8.77 (8.69 - 8.86)    | 139.85 (138.83 - 141.26) |
| 4    | Hosp. stay     | 7.85 (7.7 - 8.01)     | 99.6 (96.47 - 103.35)    |
| 1    | ICU stay       | 16.2 (15.91 - 16.52)  | 648.86 (638.93 - 668.89) |
| 2    | ICU stay       | 15.4 (15.16 - 15.67)  | 546.75 (538.2 - 563.37)  |
| 3    | ICU stay       | 14.41 (14.25 - 14.61) | 424.59 (426.1 - 428.93)  |
| 4    | ICU stay       | 12.4 (11.9 - 13.11)   | 272.68 (272.31 - 294.95) |

**Table S6.** Hospitalisation Case Ratio (HCR), ICU Case Ratio (ICU-CR), Case Fatality Ratio (CFR), Hospitalisation Fatality Ratio (HFR), ICU Fatality Ratio (ICU-FR), Hospitalisation percentage (HOSP-%), ICU admission percentage (ICU-%) and Death percentage (DEATH-%) by age-group for each wave (95% CI).

| Age group | Wave | HCR                  | ICU-CR               | CFR                  | HFR                  | ICU-FR               | HOSP-%                  | ICU-%                   | DEATH-%                |
|-----------|------|----------------------|----------------------|----------------------|----------------------|----------------------|-------------------------|-------------------------|------------------------|
| 0-9       | 1    | 0.071 (0.066, 0.076) | 0.012 (0.01, 0.014)  | 0.001 (0.0, 0.001)   | 0.01 (0.003, 0.017)  | 0.042 (0.009, 0.075) | 2.702 (2.696, 2.708)    | 1.323 (1.316, 1.33)     | 0.11 (0.107, 0.112)    |
| 0-9       | 2    | 0.048 (0.044, 0.052) | 0.009 (0.007, 0.011) | 0.0 (0.0, 0.001)     | 0.008 (0.0, 0.016)   | 0.021 (0.0, 0.05)    | 2.064 (2.058, 2.07)     | 1.109 (1.102, 1.116)    | 0.066 (0.064, 0.068)   |
| 0-9       | 3    | 0.029 (0.027, 0.03)  | 0.004 (0.004, 0.005) | 0.0 (0.0, 0.001)     | 0.017 (0.008, 0.026) | 0.067 (0.025, 0.109) | 2.063 (2.058, 2.067)    | 0.862 (0.857, 0.866)    | 0.121 (0.119, 0.123)   |
| 0-9       | 4    | 0.089 (0.084, 0.093) | 0.009 (0.007, 0.01)  | 0.0 (0.0, 0.001)     | 0.004 (0.001, 0.008) | 0.014 (0.0, 0.034)   | 16.17 (16.145, 16.195)  | 10.206 (10.154, 10.257) | 0.35 (0.341, 0.359)    |
| 10-19     | 1    | 0.022 (0.02, 0.024)  | 0.008 (0.007, 0.009) | 0.0 (0.0, 0.001)     | 0.014 (0.003, 0.025) | 0.02 (0.0, 0.042)    | 1.426 (1.421, 1.43)     | 1.397 (1.39, 1.404)     | 0.082 (0.08, 0.084)    |
| 10-19     | 2    | 0.012 (0.011, 0.013) | 0.002 (0.002, 0.003) | 0.0 (0.0, 0.0)       | 0.014 (0.0, 0.028)   | 0.036 (0.0, 0.084)   | 1.168 (1.164, 1.173)    | 0.661 (0.655, 0.666)    | 0.066 (0.064, 0.068)   |
| 10-19     | 3    | 0.005 (0.005, 0.006) | 0.001 (0.001, 0.001) | 0.0 (0.0, 0.0)       | 0.041 (0.021, 0.062) | 0.101 (0.03, 0.173)  | 0.854 (0.851, 0.857)    | 0.44 (0.437, 0.444)     | 0.114 (0.112, 0.116)   |
| 10-19     | 4    | 0.011 (0.009, 0.012) | 0.001 (0.0, 0.001)   | 0.0 (0.0, 0.0)       | 0.019 (0.001, 0.037) | 0.0 (0.0, 0.0)       | 2.468 (2.457, 2.478)    | 1.322 (1.302, 1.341)    | 0.233 (0.226, 0.241)   |
| 20-29     | 1    | 0.027 (0.025, 0.028) | 0.009 (0.008, 0.01)  | 0.001 (0.001, 0.001) | 0.041 (0.032, 0.051) | 0.082 (0.058, 0.105) | 5.291 (5.283, 5.3)      | 4.987 (4.973, 5.0)      | 0.905 (0.898, 0.912)   |
| 20-29     | 2    | 0.013 (0.012, 0.014) | 0.002 (0.002, 0.003) | 0.0 (0.0, 0.001)     | 0.034 (0.023, 0.046) | 0.136 (0.085, 0.186) | 3.908 (3.9, 3.916)      | 2.088 (2.079, 2.098)    | 0.544 (0.538, 0.55)    |
| 20-29     | 3    | 0.009 (0.009, 0.01)  | 0.002 (0.002, 0.002) | 0.001 (0.001, 0.001) | 0.088 (0.074, 0.102) | 0.195 (0.156, 0.234) | 3.824 (3.819, 3.83)     | 2.489 (2.482, 2.497)    | 1.084 (1.078, 1.089)   |
| 20-29     | 4    | 0.006 (0.005, 0.006) | 0.001 (0.0, 0.001)   | 0.0 (0.0, 0.0)       | 0.032 (0.014, 0.051) | 0.057 (0.0, 0.134)   | 3.946 (3.933, 3.96)     | 2.57 (2.543, 2.597)     | 0.641 (0.629, 0.653)   |
| 30-39     | 1    | 0.05 (0.048, 0.051)  | 0.017 (0.016, 0.018) | 0.003 (0.003, 0.004) | 0.064 (0.055, 0.072) | 0.117 (0.098, 0.137) | 9.916 (9.906, 9.927)    | 9.455 (9.437, 9.473)    | 2.604 (2.592, 2.616)   |
| 30-39     | 2    | 0.025 (0.024, 0.026) | 0.006 (0.005, 0.006) | 0.001 (0.001, 0.002) | 0.052 (0.042, 0.062) | 0.146 (0.113, 0.18)  | 7.487 (7.476, 7.497)    | 5.002 (4.988, 5.017)    | 1.648 (1.638, 1.658)   |
| 30-39     | 3    | 0.024 (0.023, 0.024) | 0.008 (0.007, 0.008) | 0.003 (0.003, 0.004) | 0.14 (0.13, 0.151)   | 0.266 (0.242, 0.29)  | 9.603 (9.594, 9.612)    | 8.266 (8.252, 8.28)     | 4.343 (4.331, 4.354)   |
| 30-39     | 4    | 0.006 (0.005, 0.006) | 0.001 (0.0, 0.001)   | 0.0 (0.0, 0.0)       | 0.044 (0.024, 0.065) | 0.146 (0.038, 0.254) | 4.482 (4.468, 4.496)    | 3.01 (2.981, 3.039)     | 0.991 (0.976, 1.006)   |
| 40-49     | 1    | 0.089 (0.086, 0.092) | 0.032 (0.03, 0.033)  | 0.01 (0.009, 0.011)  | 0.112 (0.102, 0.121) | 0.213 (0.191, 0.234) | 13.05 (13.037, 13.062)  | 12.906 (12.886, 12.926) | 6.058 (6.041, 6.076)   |
| 40-49     | 2    | 0.05 (0.048, 0.051)  | 0.015 (0.014, 0.016) | 0.005 (0.004, 0.005) | 0.093 (0.082, 0.104) | 0.221 (0.192, 0.249) | 10.849 (10.837, 10.862) | 9.568 (9.548, 9.588)    | 4.153 (4.137, 4.169)   |
| 40-49     | 3    | 0.051 (0.049, 0.052) | 0.02 (0.019, 0.021)  | 0.01 (0.01, 0.011)   | 0.199 (0.189, 0.208) | 0.316 (0.299, 0.334) | 16.126 (16.115, 16.137) | 17.189 (17.17, 17.208)  | 10.33 (10.313, 10.346) |
| 40-49     | 4    | 0.008 (0.008, 0.009) | 0.001 (0.001, 0.001) | 0.001 (0.0, 0.001)   | 0.08 (0.054, 0.105)  | 0.155 (0.062, 0.248) | 5.111 (5.096, 5.125)    | 4.258 (4.224, 4.293)    | 2.099 (2.077, 2.121)   |
| 50-59     | 1    | 0.163 (0.159, 0.166) | 0.059 (0.057, 0.061) | 0.028 (0.026, 0.03)  | 0.168 (0.159, 0.177) | 0.307 (0.287, 0.327) | 20.294                  | 20.52 (20.496, 20.544)  | 14.227                 |

|       |   |                         |                         |                         |                         |                         |                               |                               |                               |
|-------|---|-------------------------|-------------------------|-------------------------|-------------------------|-------------------------|-------------------------------|-------------------------------|-------------------------------|
|       |   | 0.167)                  | 0.062)                  | 0.029)                  | 0.178)                  | 0.326)                  | (20.279,<br>20.308)           | 20.544)                       | (14.201,<br>14.253)           |
| 50-59 | 2 | 0.099 (0.096,<br>0.102) | 0.035 (0.034,<br>0.037) | 0.015 (0.014,<br>0.016) | 0.144 (0.134,<br>0.154) | 0.294 (0.272,<br>0.316) | 19.142<br>(19.126,<br>19.158) | 19.844<br>(19.817,<br>19.871) | 11.388<br>(11.362,<br>11.413) |
| 50-59 | 3 | 0.092 (0.091,<br>0.094) | 0.038 (0.037,<br>0.04)  | 0.024 (0.023,<br>0.025) | 0.26 (0.251,<br>0.268)  | 0.4 (0.385,<br>0.415)   | 23.02 (23.007,<br>23.032)     | 26.068<br>(26.046,<br>26.09)  | 19.303<br>(19.281,<br>19.324) |
| 50-59 | 4 | 0.019 (0.018,<br>0.021) | 0.004 (0.003,<br>0.004) | 0.002 (0.002,<br>0.003) | 0.124 (0.099,<br>0.148) | 0.215 (0.145,<br>0.286) | 8.196 (8.177,<br>8.214)       | 9.545 (9.495,<br>9.595)       | 5.423 (5.388,<br>5.457)       |
| 60-69 | 1 | 0.29 (0.284,<br>0.296)  | 0.12 (0.116,<br>0.124)  | 0.08 (0.076,<br>0.084)  | 0.273 (0.262,<br>0.284) | 0.426 (0.406,<br>0.445) | 20.523<br>(20.508,<br>20.537) | 23.712<br>(23.686,<br>23.737) | 23.41 (23.379,<br>23.441)     |
| 60-69 | 2 | 0.19 (0.186,<br>0.195)  | 0.079 (0.076,<br>0.082) | 0.049 (0.046,<br>0.051) | 0.254 (0.242,<br>0.265) | 0.434 (0.414,<br>0.454) | 22.411<br>(22.394,<br>22.428) | 27.006<br>(26.975,<br>27.036) | 23.171<br>(23.137,<br>23.205) |
| 60-69 | 3 | 0.156 (0.153,<br>0.159) | 0.067 (0.065,<br>0.069) | 0.056 (0.054,<br>0.058) | 0.359 (0.349,<br>0.369) | 0.51 (0.494,<br>0.526)  | 21.126<br>(21.114,<br>21.139) | 24.708<br>(24.686,<br>24.73)  | 24.456<br>(24.433,<br>24.48)  |
| 60-69 | 4 | 0.042 (0.039,<br>0.044) | 0.01 (0.009,<br>0.011)  | 0.008 (0.007,<br>0.009) | 0.176 (0.154,<br>0.197) | 0.333 (0.28,<br>0.387)  | 14.063<br>(14.039,<br>14.086) | 21.806<br>(21.736,<br>21.876) | 13.061 (13.01,<br>13.112)     |
| 70-79 | 1 | 0.433 (0.424,<br>0.442) | 0.176 (0.169,<br>0.184) | 0.174 (0.167,<br>0.181) | 0.398 (0.384,<br>0.412) | 0.591 (0.569,<br>0.613) | 15.231<br>(15.218,<br>15.244) | 17.31 (17.287,<br>17.332)     | 25.302 (25.27,<br>25.333)     |
| 70-79 | 2 | 0.332 (0.324,<br>0.339) | 0.147 (0.141,<br>0.153) | 0.127 (0.121,<br>0.132) | 0.378 (0.364,<br>0.392) | 0.566 (0.544,<br>0.587) | 18.657<br>(18.642,<br>18.673) | 23.997<br>(23.968,<br>24.026) | 28.922<br>(28.886,<br>28.959) |
| 70-79 | 3 | 0.25 (0.245,<br>0.256)  | 0.098 (0.094,<br>0.101) | 0.12 (0.116,<br>0.124)  | 0.477 (0.464,<br>0.49)  | 0.634 (0.615,<br>0.654) | 13.574<br>(13.563,<br>13.584) | 14.355<br>(14.337,<br>14.373) | 20.902 (20.88,<br>20.924)     |
| 70-79 | 4 | 0.115 (0.11,<br>0.12)   | 0.023 (0.02,<br>0.025)  | 0.027 (0.024,<br>0.03)  | 0.224 (0.204,<br>0.244) | 0.403 (0.35,<br>0.456)  | 19.523<br>(19.496,<br>19.55)  | 24.229<br>(24.156,<br>24.302) | 23.09 (23.027,<br>23.154)     |
| 80+   | 1 | 0.548 (0.536,<br>0.56)  | 0.142 (0.134,<br>0.151) | 0.313 (0.302,<br>0.324) | 0.562 (0.545,<br>0.578) | 0.674 (0.643,<br>0.704) | 11.568<br>(11.556,<br>11.579) | 8.391 (8.374,<br>8.408)       | 27.303 (27.27,<br>27.335)     |
| 80+   | 2 | 0.468 (0.457,<br>0.479) | 0.121 (0.114,<br>0.128) | 0.243 (0.233,<br>0.252) | 0.509 (0.493,<br>0.526) | 0.671 (0.64,<br>0.702)  | 14.314 (14.3,<br>14.328)      | 10.724<br>(10.703,<br>10.745) | 30.043<br>(30.006,<br>30.08)  |
| 80+   | 3 | 0.387 (0.378,<br>0.396) | 0.082 (0.077,<br>0.087) | 0.237 (0.229,<br>0.245) | 0.61 (0.596,<br>0.625)  | 0.717 (0.688,<br>0.747) | 9.81 (9.801,<br>9.819)        | 5.623 (5.612,<br>5.635)       | 19.348<br>(19.327,<br>19.37)  |
| 80+   | 4 | 0.261 (0.252,<br>0.271) | 0.037 (0.033,<br>0.041) | 0.108 (0.102,<br>0.115) | 0.391 (0.37,<br>0.411)  | 0.576 (0.522,<br>0.631) | 26.042<br>(26.012,<br>26.072) | 23.054<br>(22.983,<br>23.126) | 54.111<br>(54.035,<br>54.186) |
| all   | 1 | 0.111 (0.11,<br>0.112)  | 0.04 (0.039,<br>0.041)  | 0.027 (0.026,<br>0.028) | 0.239 (0.235,<br>0.244) | 0.366 (0.357,<br>0.375) | -                             | -                             | -                             |
| all   | 2 | 0.074 (0.073,<br>0.075) | 0.026 (0.025,<br>0.026) | 0.018 (0.018,<br>0.019) | 0.243 (0.238,<br>0.249) | 0.415 (0.404,<br>0.425) | -                             | -                             | -                             |
| all   | 3 | 0.054 (0.054,<br>0.055) | 0.02 (0.02,<br>0.02)    | 0.017 (0.017,<br>0.017) | 0.31 (0.305,<br>0.314)  | 0.444 (0.436,<br>0.452) | -                             | -                             | -                             |
| all   | 4 | 0.028 (0.028,<br>0.029) | 0.004 (0.004,<br>0.005) | 0.006 (0.005,<br>0.006) | 0.189 (0.18,<br>0.197)  | 0.338 (0.313,<br>0.363) | -                             | -                             | -                             |



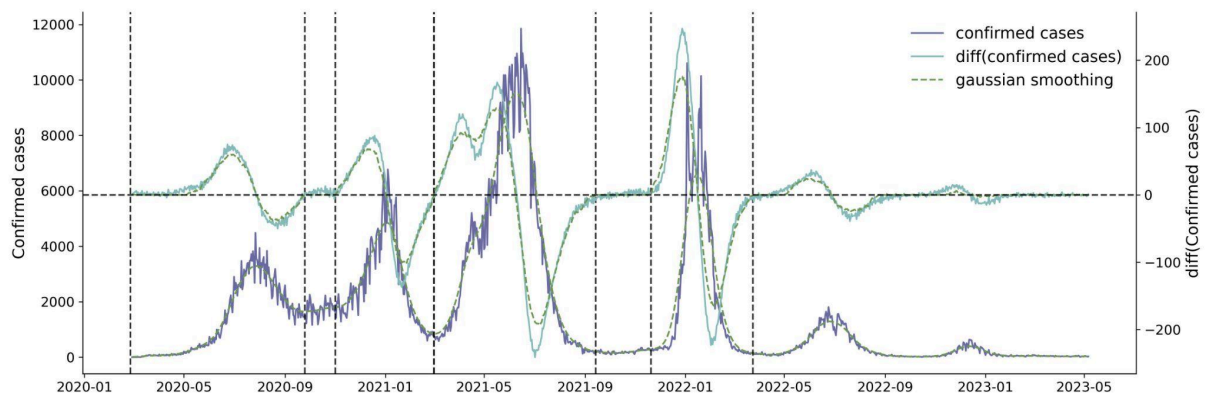

**Fig. S1.** New daily confirmed cases (left axis) and daily difference (right axis). In both cases, a Gaussian smoothing method was performed to avoid multiple roots around close dates. The roots selected as start and end dates of each waves are represented using black dashed lines.

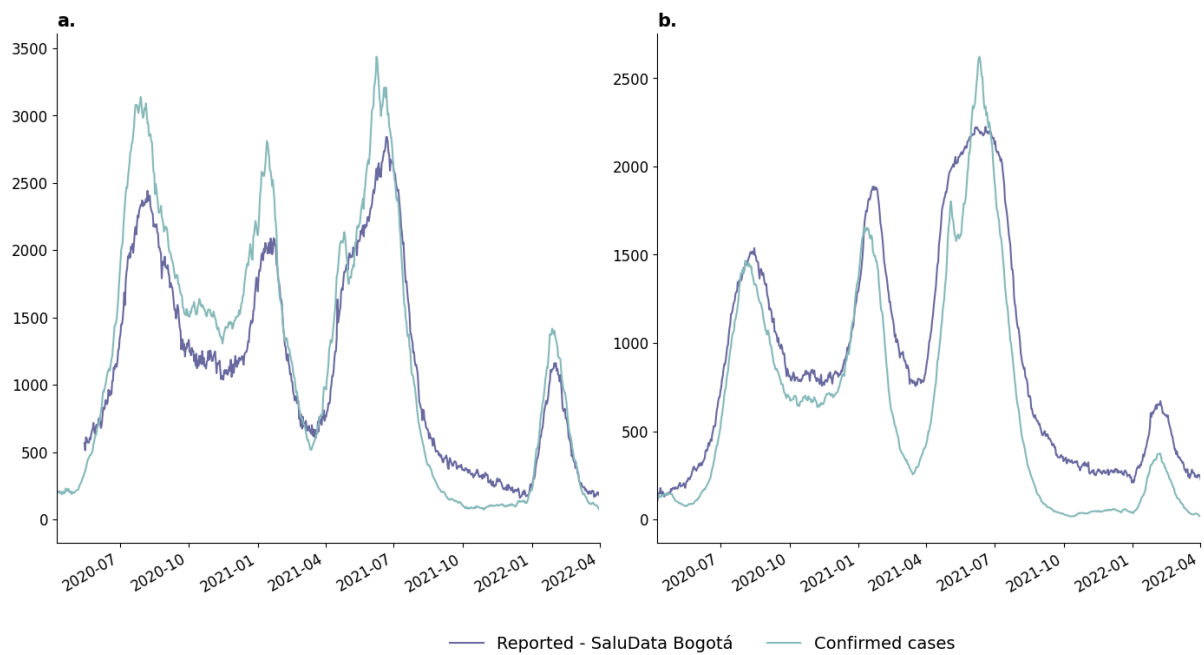

**Fig. S2.** Comparison between daily occupancies reported by SaluData Bogotá[4, 5] and reconstruction made using Confirmed cases dataset a) General hospital bed occupancy. b) ICU occupancy.

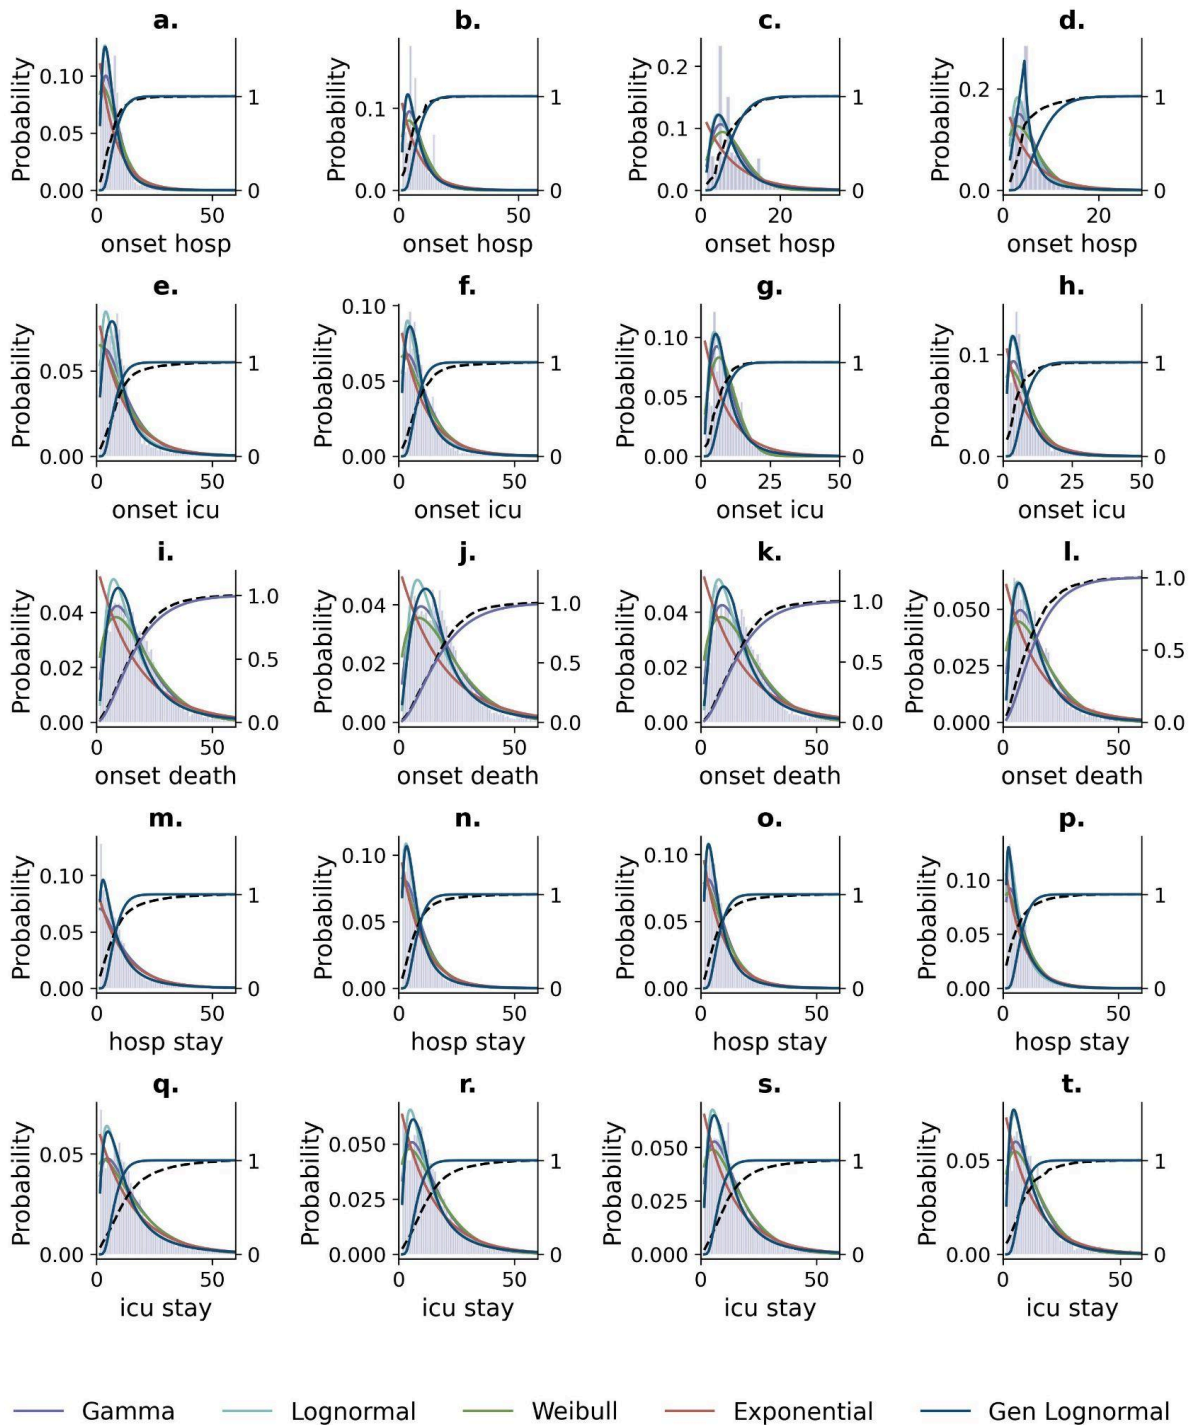

**Fig. S3. Observed delay times fitted to different probability density functions.** a-d) Onset to hospitalisation, e-h) Onset to ICU, i-l) Onset to death, m-p) Stay at the general hospital, q-t) ICU stay. In every case, the cumulative distribution of the data compared to the best distribution, according to the BF, is shown on the left axis. The left axis gives the probability of occurrence of each event, while the right axis shows the cumulative probability of the best model.

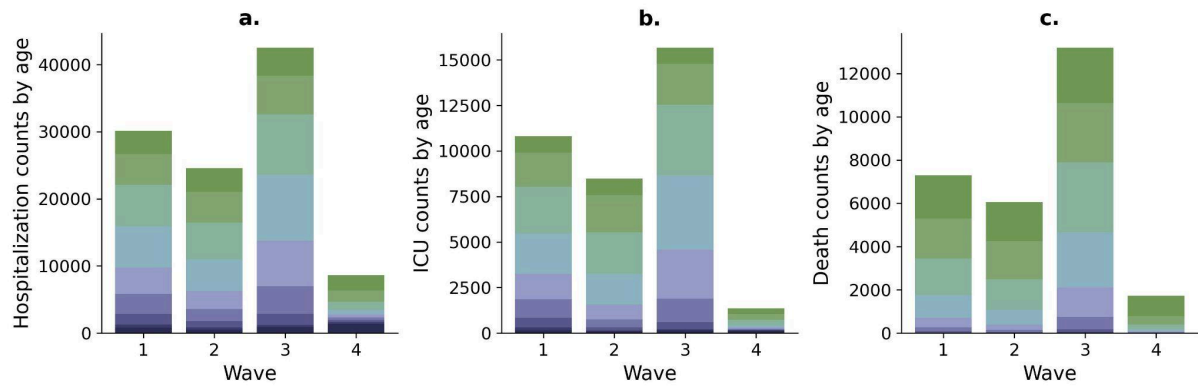

**Fig. S4.** Population counts for severe outcomes, disaggregated by age. a) Hospitalisations, b) ICU, c) Deaths.

## References

1. Singh B, Sharma KK, Rathi S, Singh G. t. *Comput Stat.* 2012;27:51–67.
2. Hawryluk I, Mellan TA, Hoeltgebaum H, Mishra S, Schnekenberg RP, Whittaker C, et al. Inference of COVID-19 epidemiological distributions from Brazilian hospital data. *J R Soc Interface.* 2020;17:20200596.
3. Kass RE, Raftery AE. Bayes Factors. *J Am Stat Assoc.* 1995;90:773–95.
4. General hospital occupancy Bogotá - SaluData Bogotá.  
<https://saludata.saludcapital.gov.co/osb/wp-content/uploads/medios/Ocupacion-Hospitalizacion-COVID-19.csv>. Accessed 3 Jan 2023.
5. ICU occupancy Bogotá - Datos Abiertos Bogotá.  
<https://datosabiertos.bogota.gov.co/dataset/ocupacion-de-camas-uci-covid-19-bogota-d-c>. Accessed 3 Jan 2023.
